# Supplementary material
Source: Springer Nature journal article supplement (https://www.springermedizin.de/resource/supplementary/12936_2014_3370_MOESM18_ESM.pdf/9545746)

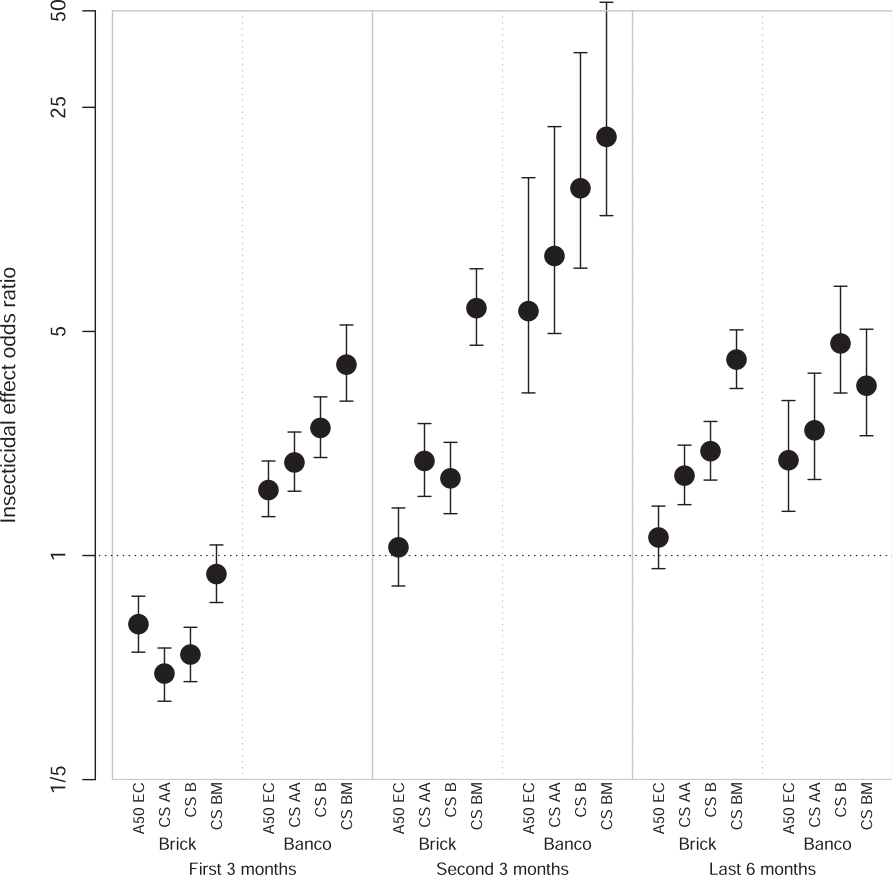

Supplement: MOESM18 [file 9545746]
